# Supplementary material for: Free-standing Co/Zn sulfide supported on Cu-foam for efficient overall water splitting
Source: Royal Society of Chemistry journal article supplement (doi:10.1039/d2nj00335j), 2022-01-01
Supplement: d2nj00335j8.pdf [file d2nj00335j8.pdf]

## **Free-standing Co/Zn sulfide supported on Cu-foam for efficient overall water splitting**

Haoran Pan<sup>a</sup>, Yue Wang<sup>a</sup>, Zhenjie Lu<sup>a</sup>, Xinning Huang<sup>b</sup>, Xingxing Chen<sup>a\*</sup>

<sup>a</sup> *Research Group of Functional Materials for Electrochemical Energy Conversion, School of Chemical Engineering, University of Science and Technology Liaoning, Qianshan Middle Road 185, 114051 Anshan, China*

<sup>b</sup> *College of Innovation and Entrepreneurship, University of Science and Technology Liaoning, Qianshan Road 185, 114051 Anshan, China*

\* *Corresponding author. E-mail: xingchenstar79@163.com (X. X. Chen)*

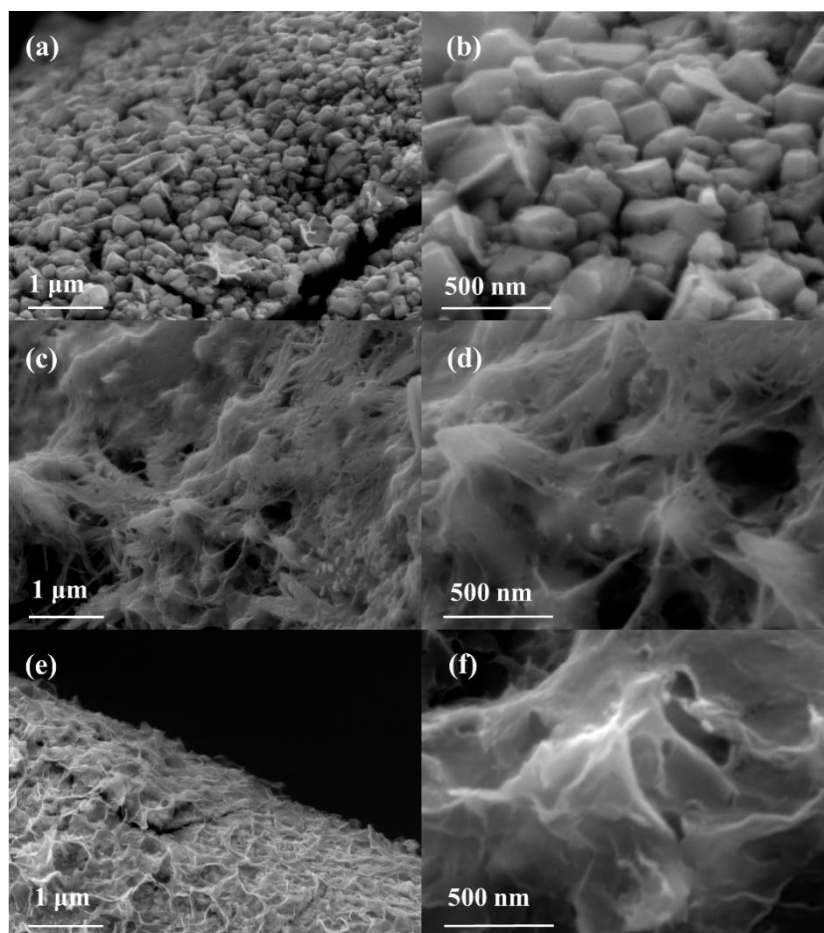

**Fig. S1** SEM images of (a, b) Co-S/Cu-F, (c, d) Zn-S/Cu-F, and (e, f) CoZn-S/Cu-F.

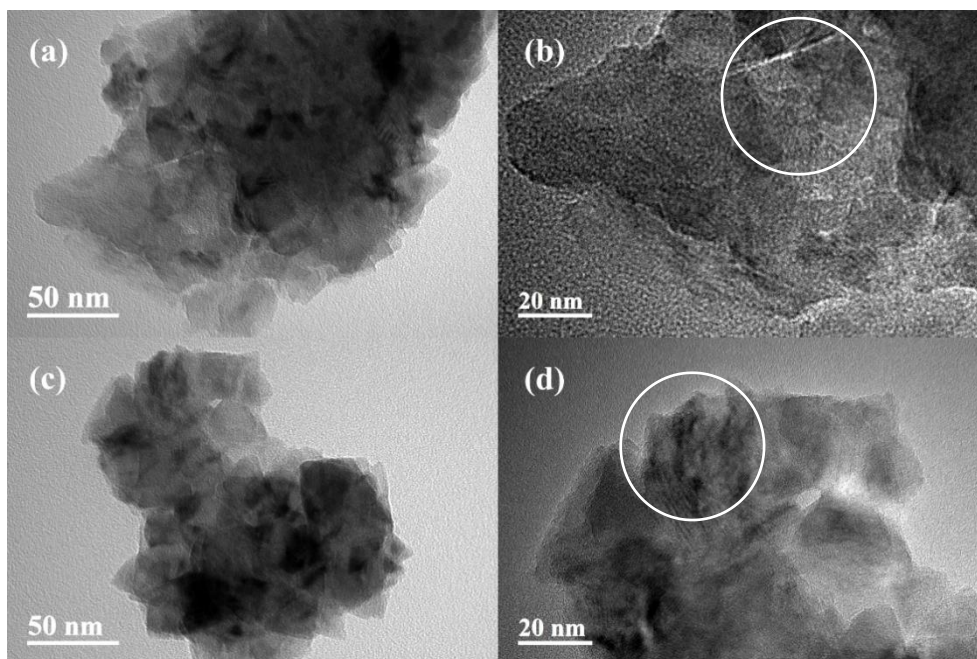

**Fig. S2** TEM images of CoZn-S/Cu-F.

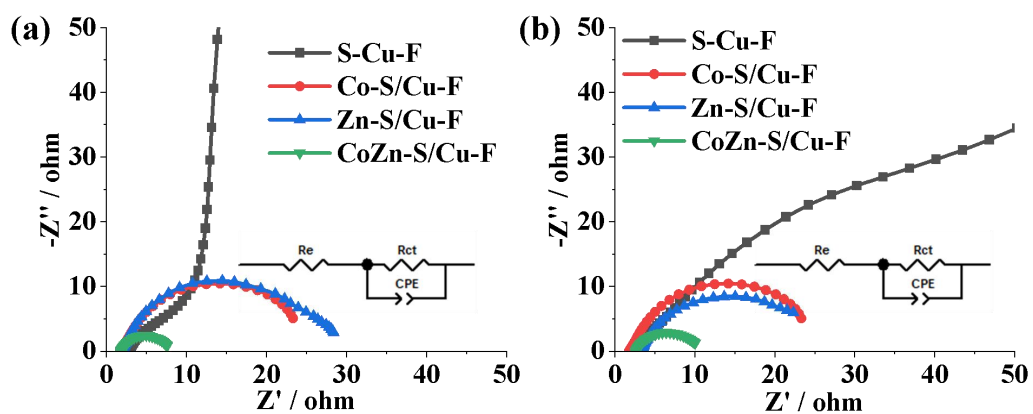

**Fig. S3** Nyquist plots at 1.4 V and -0.1 V in 1 M KOH for (a) OER and (b) HER, from 100 kHz to 0.01 Hz using ac perturbation voltage of 10 mV.

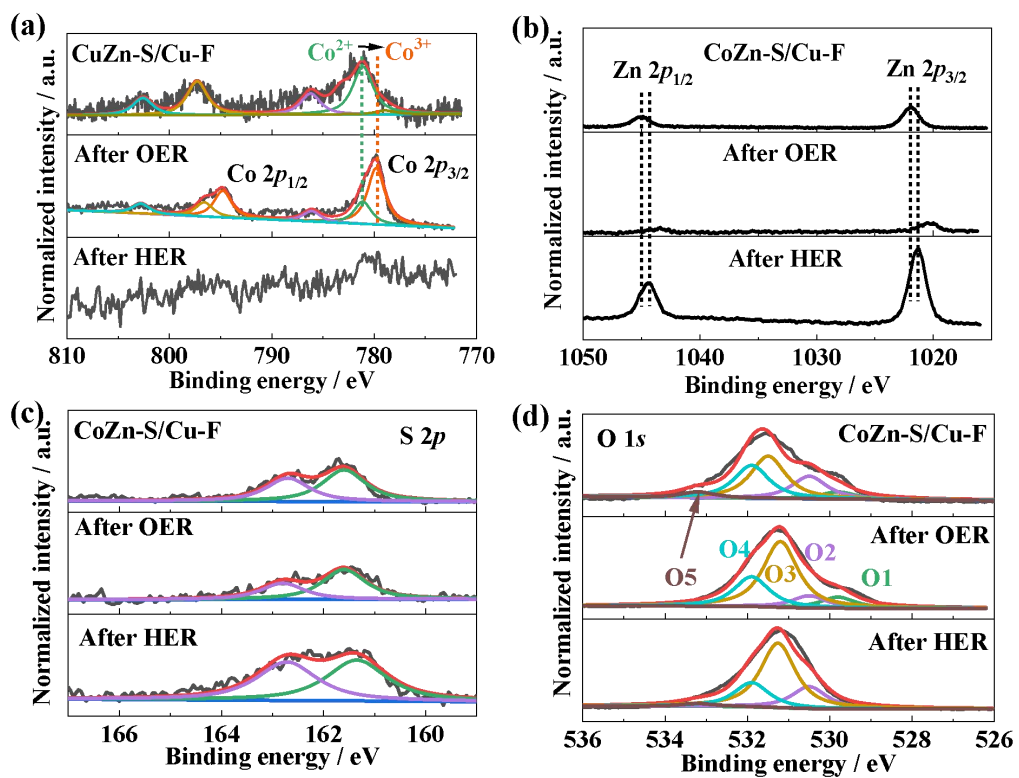

**Fig. S4** (a) Co 2p spectra, (b) Zn 2p spectra, (c) S 2p spectra, and (d) O 1s spectra of CoZn-S/Cu-F before and after OER and HER stability tests.

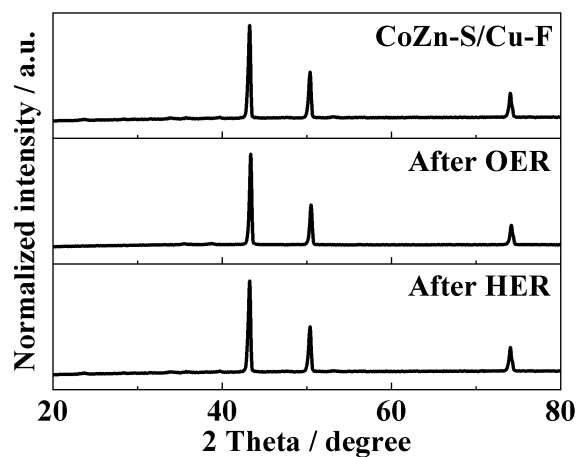

**Fig. S5** XRD spectra of CoZn-S/Cu-F and after OER and HER stability tests.

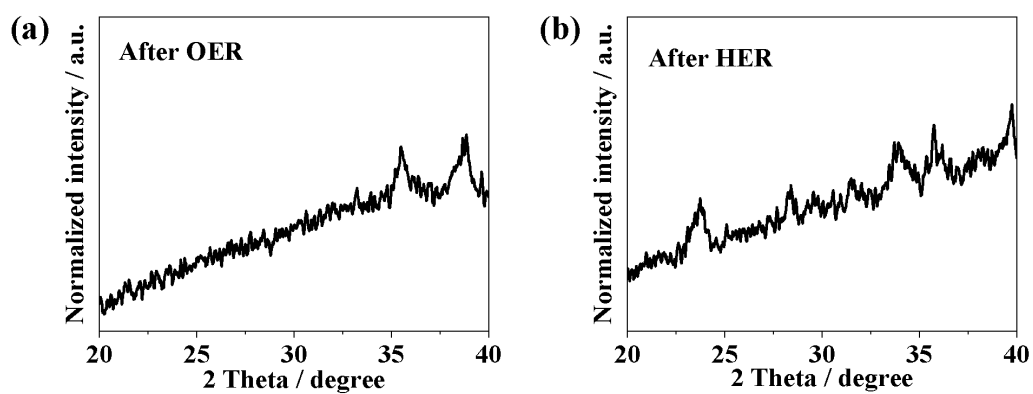

**Fig. S6** XRD spectra of CoZn-S/Cu-F after (a) OER and (b) HER stability tests at a high magnification showing the presence of CuO and Cu(OH)<sub>2</sub>, respectively.
