# Supplementary figures and images for: Free-standing Co/Zn sulfide supported on Cu-foam for efficient overall water splitting
Source: Royal Society of Chemistry journal article supplement (doi:10.1039/d2nj00335j), 2022-01-01

(a)

50 nm

(c)

50 nm

(b)

20 nm

(d)

20 nm

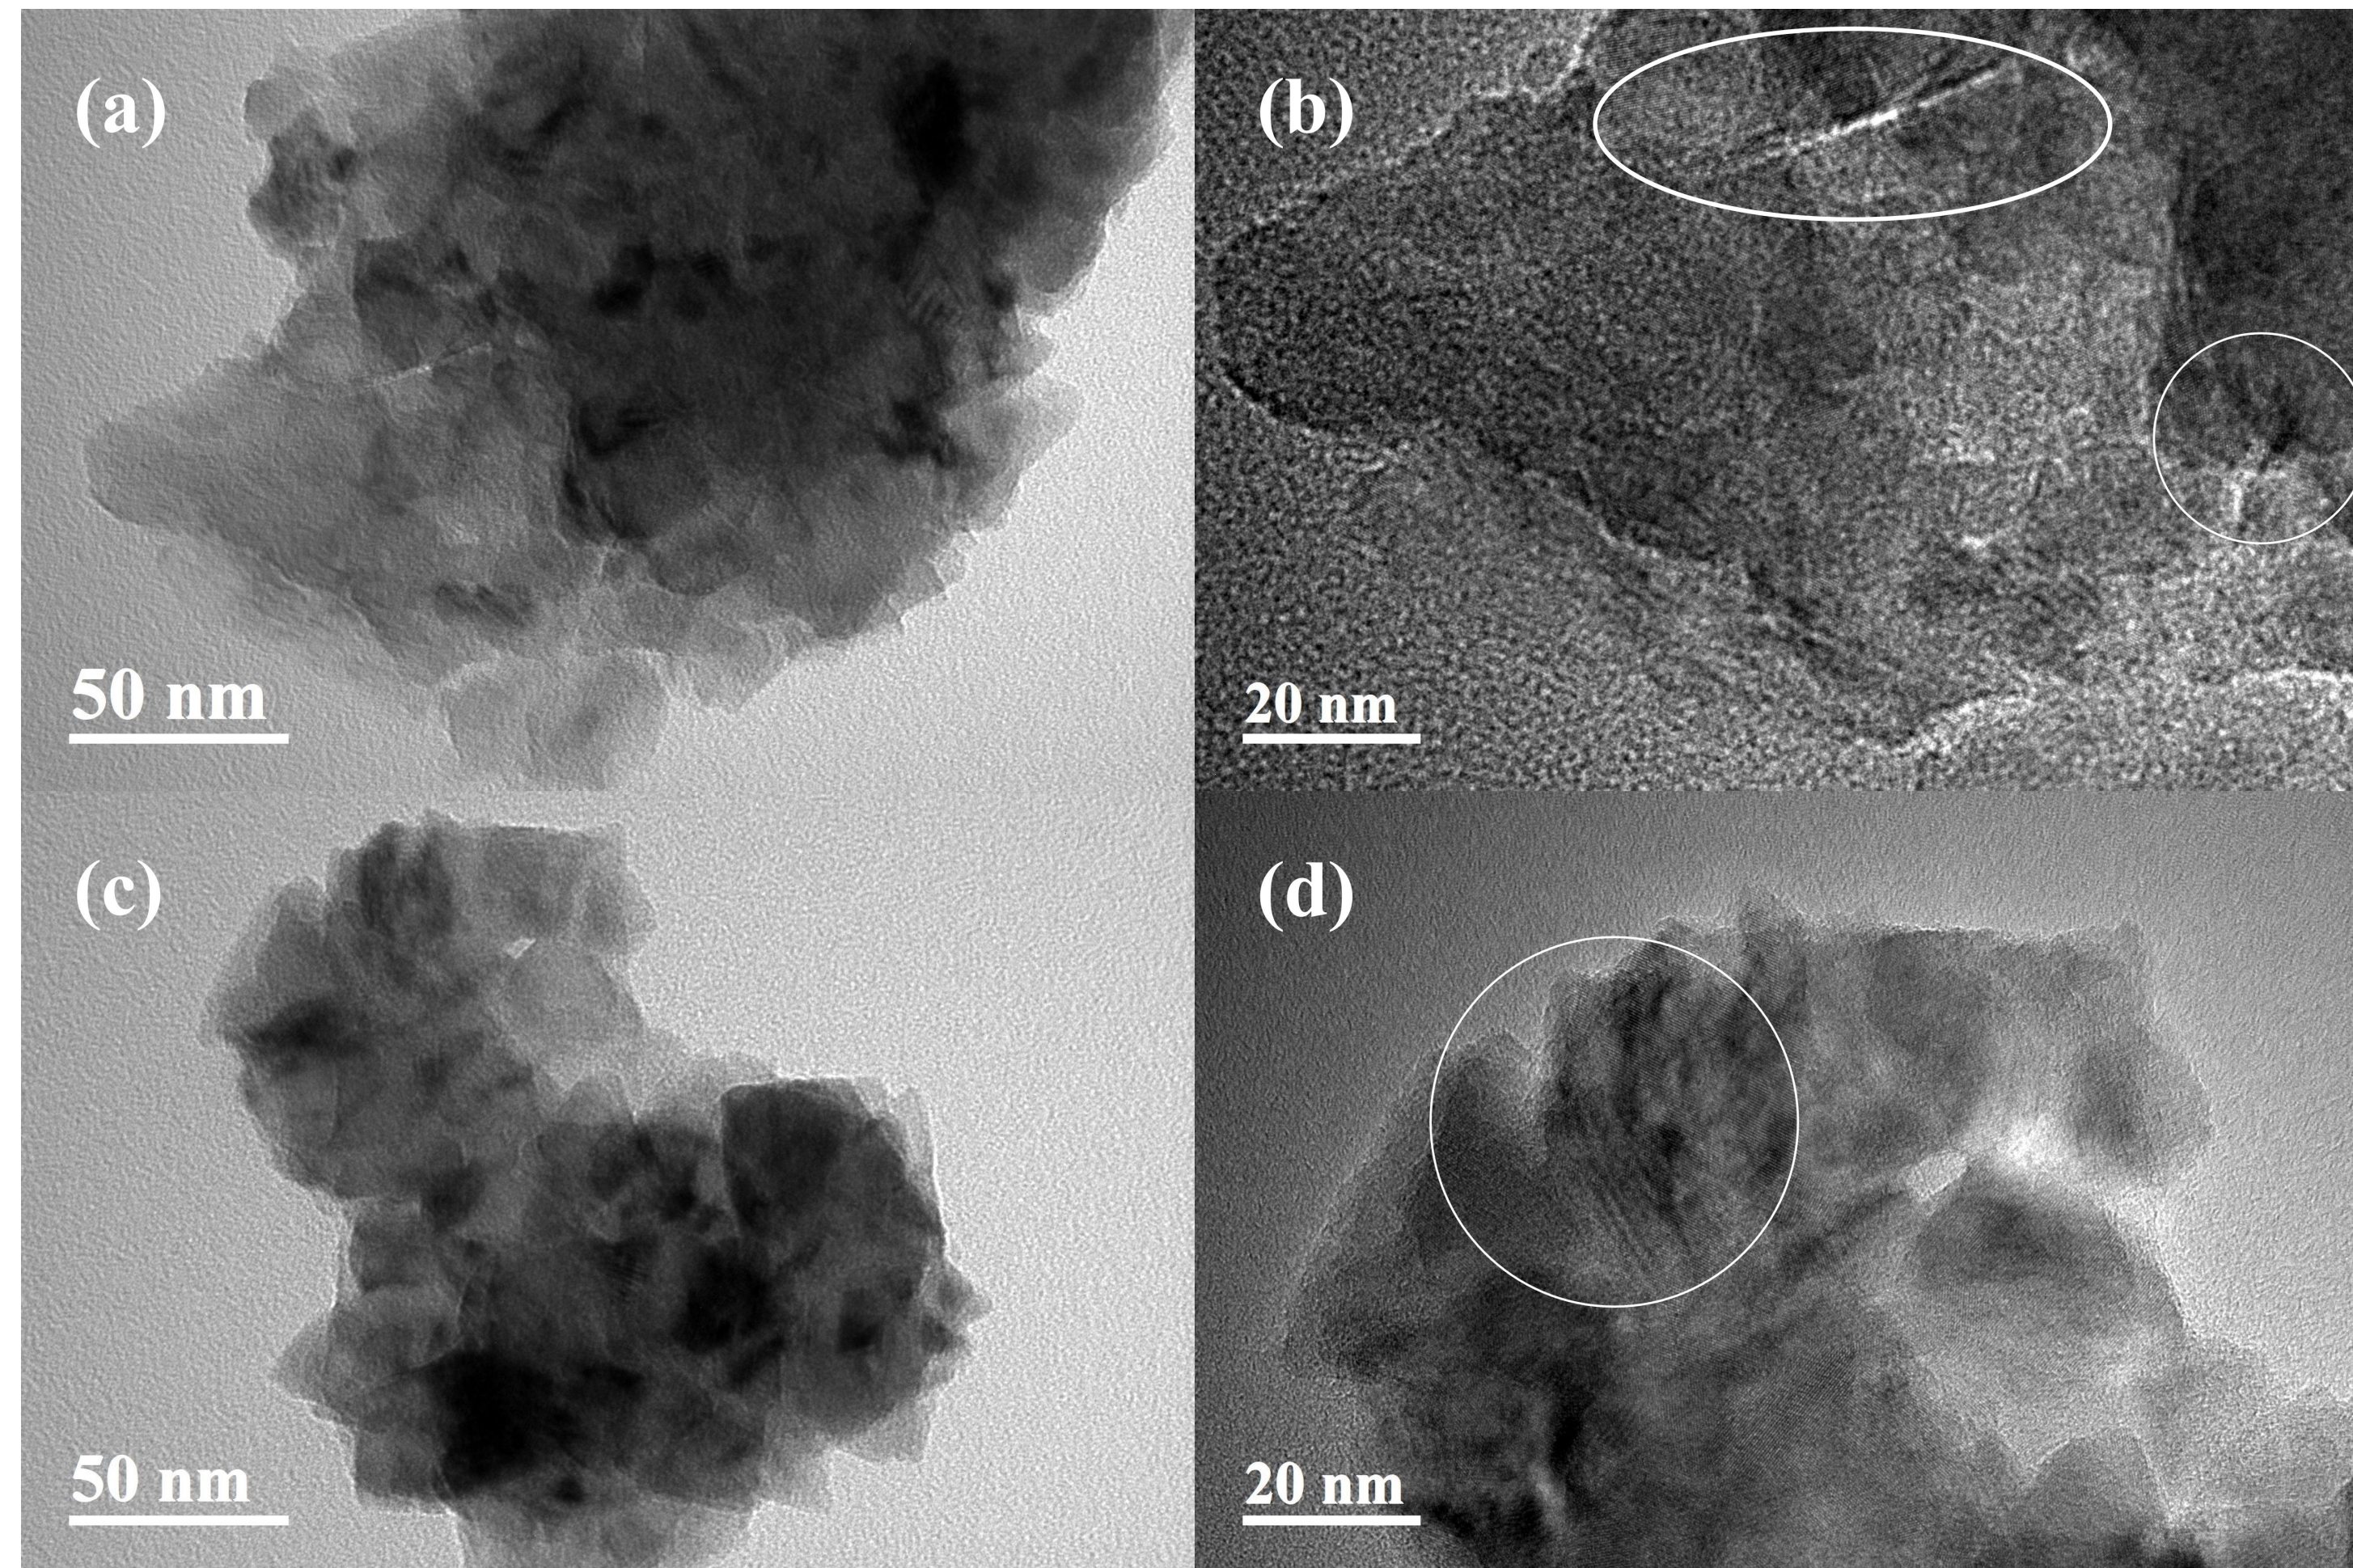

Supplement: d2nj00335j2.pdf [file d2nj00335j2.pdf]

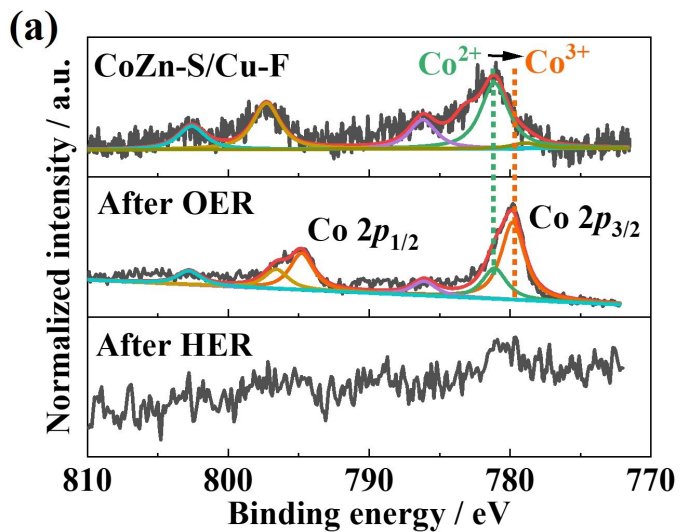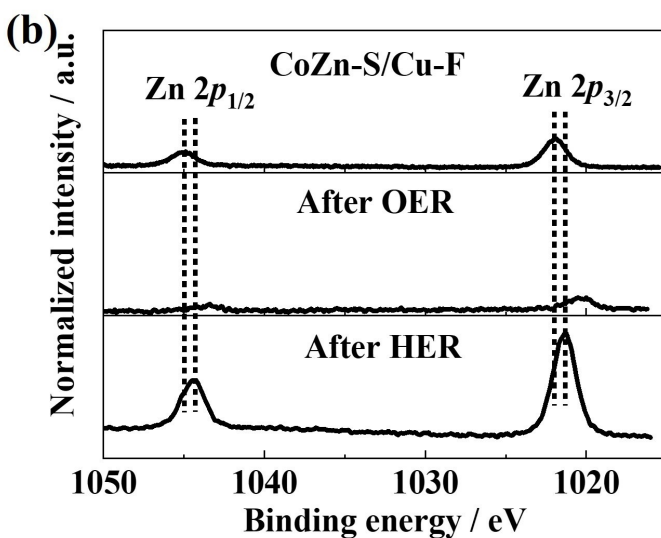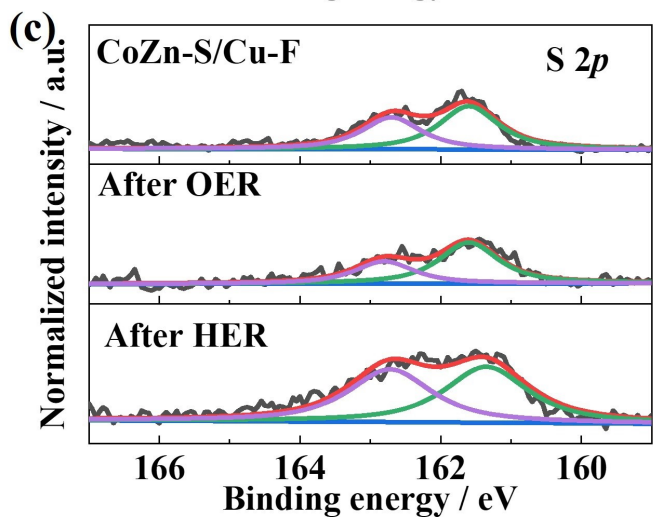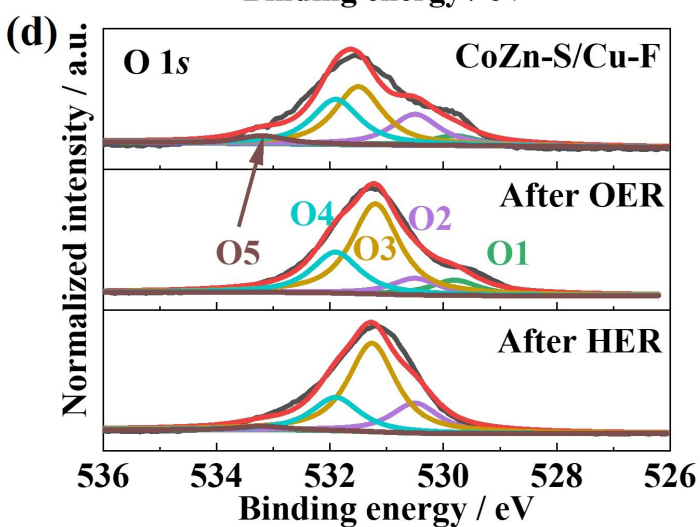

Supplement: d2nj00335j5.pdf [file d2nj00335j5.pdf]

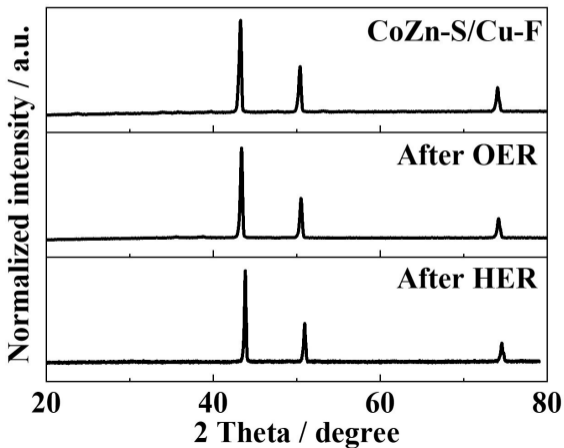

Supplement: d2nj00335j6.pdf [file d2nj00335j6.pdf]
